# Supplementary material for: Astaxanthin Sensitizes Low SOD2-Expressing GBM Cell Lines to TRAIL Treatment via Pathway Involving Mitochondrial Membrane Depolarization
Source: MDPI journal article supplement (doi:10.3390/antiox11020375), 2022-02-13
Supplement: s1 [file s1]

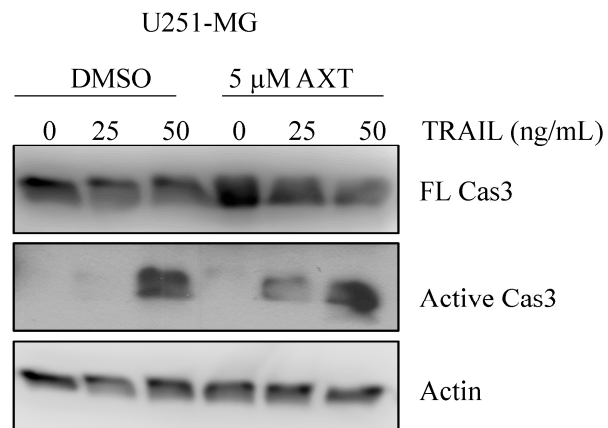

**Figure S1.** Western blot analysis of Caspase-3 protein in AXT and TRAIL-treated U251-MG cells.

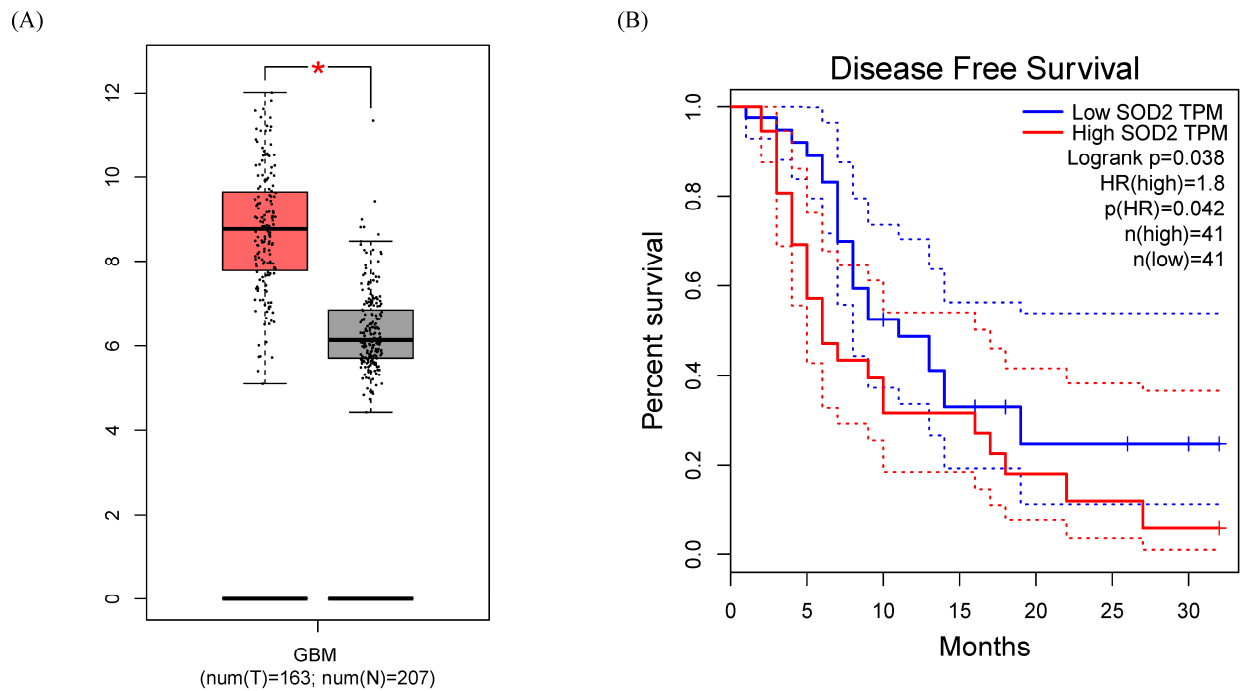

**Figure S2.** GBM patients' tumor (T) and normal (T) brain tissues SOD2 expression (A) and disease-free survival plot with hazard ratio (HR) (B) from GEP.
